# Supplementary material
Source: publisher figshare collection journal article supplement (https://karger.figshare.com/articles/dataset/_/28559198)

**Supplemental fig. 1.** (A) Scatter plots displaying the relationship between average circumpapillary retinal nerve fiber layer (cpRNFL) thickness and mean deviation (MD), Visual Field Index (VFI), and pattern electroretinogram ratio (PERGratio). The total variance explained by each model is estimated using R2. The percentages of variance explained by average cpRNFL thickness are 14%, 24%, and 32% for PERGratio, MD, and VFI, respectively. (B) Scatter plots displaying relationship between average ganglion cell inner plexiform layer (GCIPL) thickness and MD, VFI, and PERGratio. The percentages of variance explained by average GCIPL thickness are 5%, 9%, and 16% for PERGratio, MD, and VFI, respectively. Blue dots represent normal healthy participants and red dots represent patients with early primary open angle glaucoma (POAG).


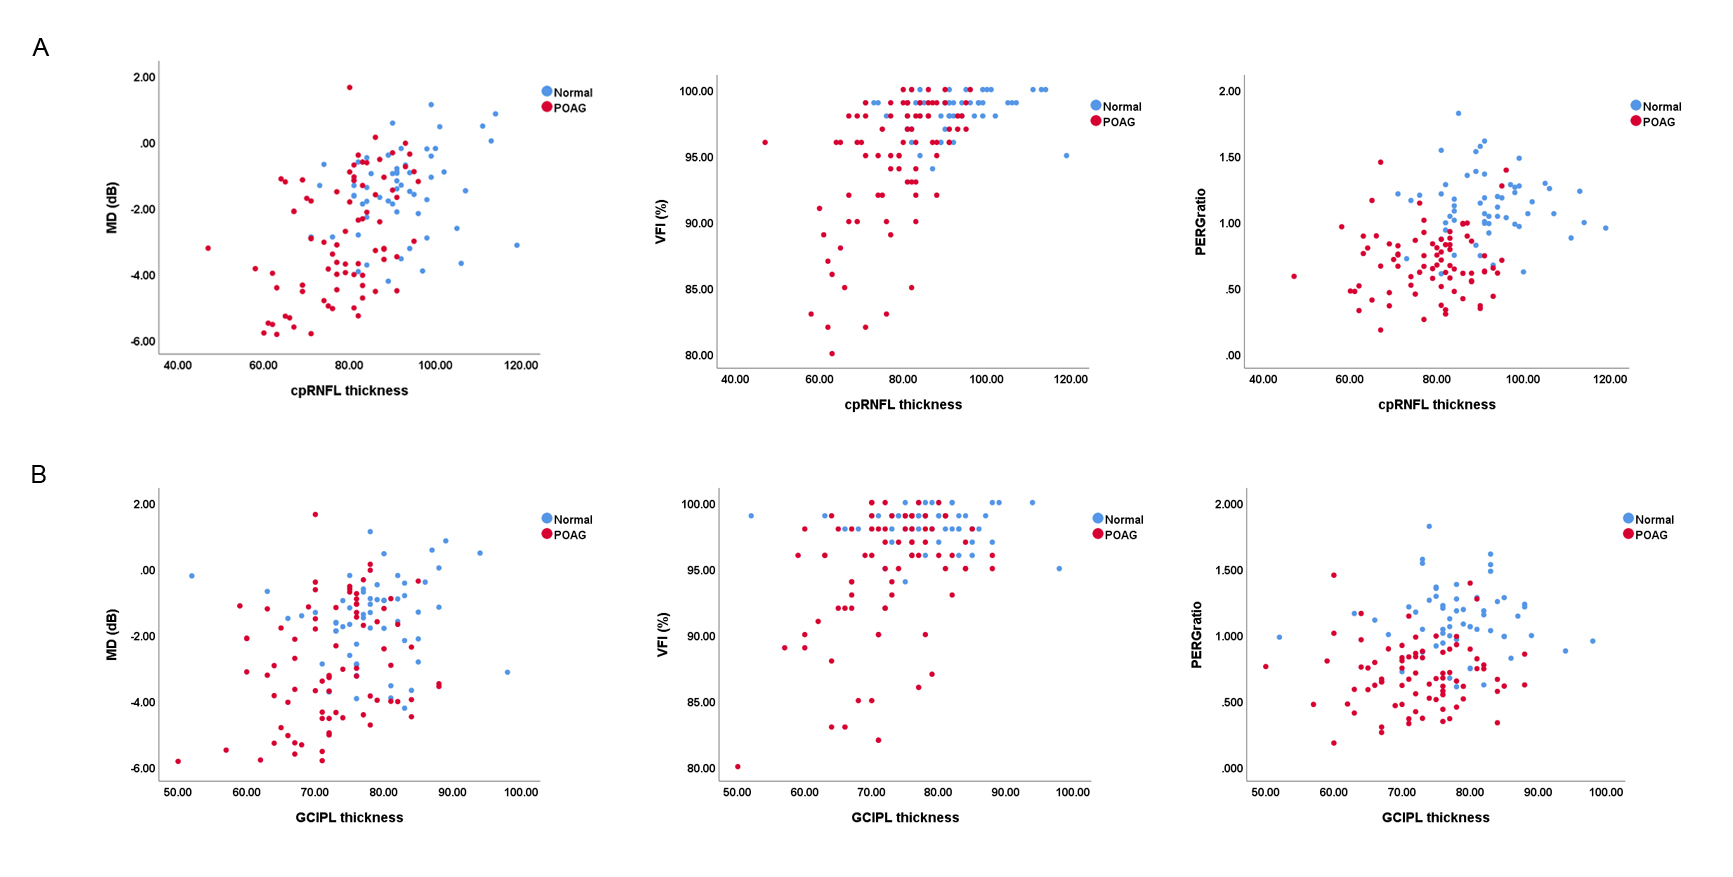

Supplement: Supplementary file 1 [file 1]
